# Supplementary material for: Porous organic polymers derived from tetrahedral silicon-centered monomers and a stereocontorted spirobifluorene-based precursor: synthesis, porosity and carbon dioxide sorption
Source: Royal Society of Chemistry journal article supplement (doi:10.1039/c5ra11359h), 2015-01-01
Supplement: c5ra11359h1.pdf [file c5ra11359h1.pdf]

# Porous Organic Polymers Derived from Tetrahedral Silicon-Centered Monomers and Stereocontorted Spirobifluorene-Based Precursor: Synthesis, Porosity and Carbon Dioxide Sorption

Qing-Yu Ma,<sup>a,b,\*</sup> Bing-Xue Yang<sup>a,b</sup> and Jian-Quan Li<sup>a,b</sup>

<sup>a</sup>Shandong Provincial Key Laboratory of Preparation and Measurement of Building Materials, University of Jinan, Jinan 250022, Shandong, P. R. China; <sup>b</sup> School of Materials Science and Engineering, University of Jinan, Jinan 250022, Shandong, P. R. China \*Corresponding author: mse\_maqy@ujn.edu.cn, Tel: +86 531 89736751;

Fax: +86 531 82523518.

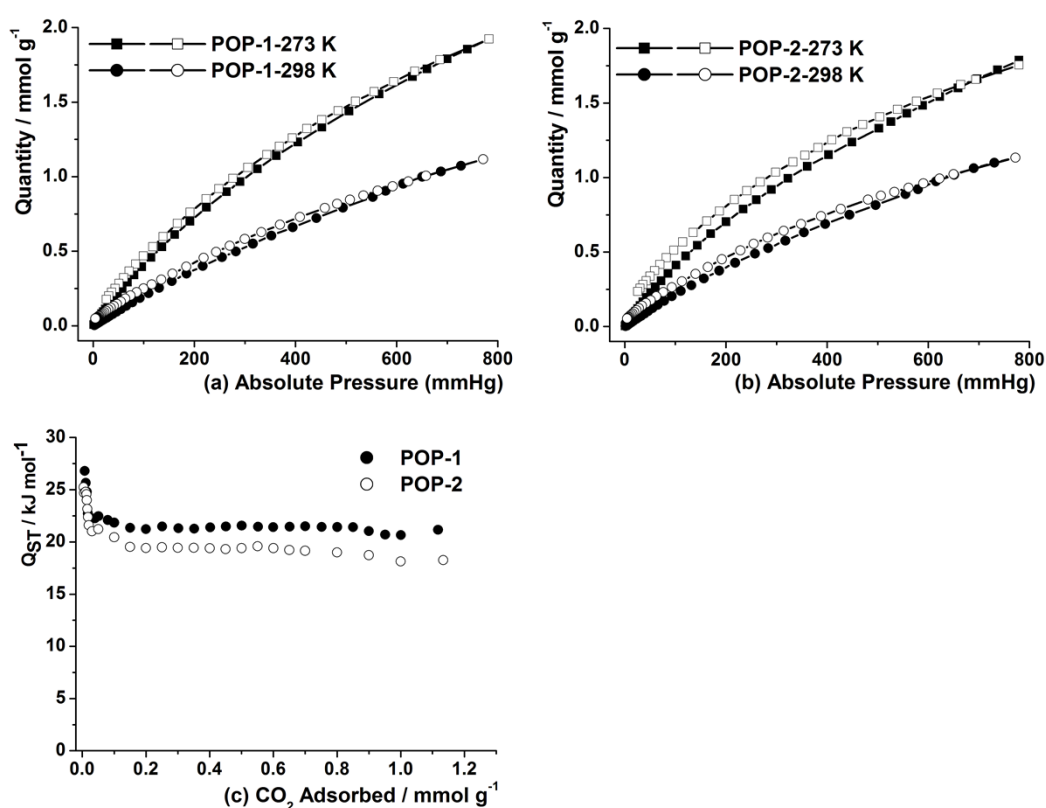

**Fig. S1** Carbon dioxide adsorption (closed symbols) and desorption (open symbols) isotherms of POP-1 (a) and POP-2 (b) at 273 K and 298 K; (c) Isosteric heat of carbon dioxide adsorption of POP-1 and POP-2

## Henry's Law selectivity of CO<sub>2</sub> over other gases in POP-1 and POP-2 at 298 K

A nice fitting of CO<sub>2</sub> and CH<sub>4</sub> isotherms has been calculated based on Toth isotherm model.<sup>[1,2]</sup>

$$q = q_{sat} \frac{b^{1/t} P}{(1 + b^t)^{1/t}}$$

where  $q$  is the uptake in mmol g<sup>-1</sup>,  $q_{sat}$  is the saturation uptake in mmol g<sup>-1</sup>,  $P$  is the pressure in torr,  $t$  and  $b$  are parameters which are specific for adsorbent pairs.

The Henry law constant  $K$ , quantifies the extent of the adsorption of a given adsorbate by a solid. The magnitude of  $K$  depends on the properties of both adsorbate and solid. For the Toth isotherm, the Henry law constant is defined by the following equation:

$$K = \lim_{P \rightarrow 0} \left( \frac{dq}{dP} \right) = b^{1/t} q_{sat}$$

Finally, the Henry's Law selectivity  $S_{\alpha/\beta}$  of gas  $\alpha$  over  $\beta$  is given by the following equation:

$$S_{\alpha/\beta} = \frac{K_{\alpha}}{K_{\beta}}$$

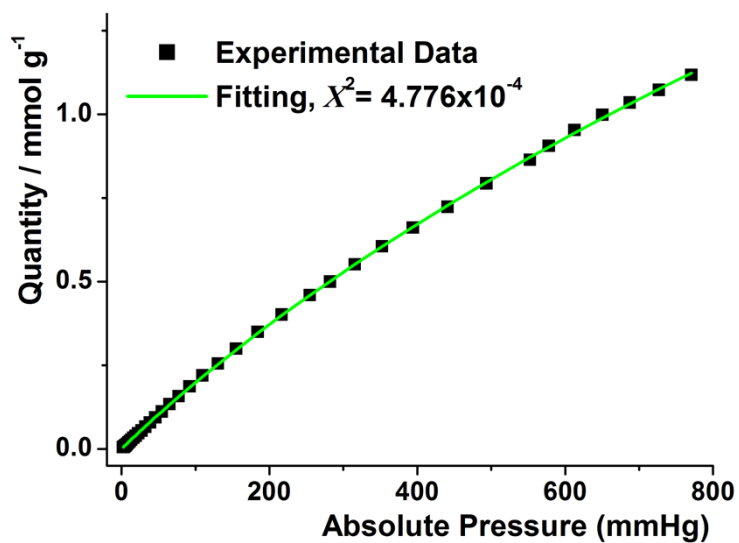

**Fig. S2.** Toth model fitting of CO<sub>2</sub> adsorption isotherm of POP-1 at 298 K.  $q_{\text{sat}} = 7.24$ ,  
 $b = 0.002836$ ,  $t = 0.724$ , Henry's law constant,  $K = 1.68 \text{ mmol g}^{-1} \text{ atm}^{-1}$

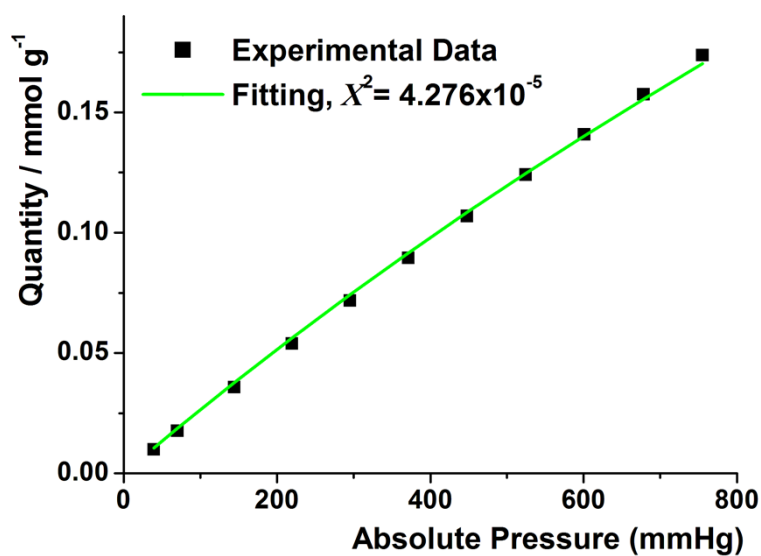

**Fig. S3.** Toth model fitting of N<sub>2</sub> adsorption isotherm of POP-1 at 298 K.  $q_{\text{sat}} = 0.999$ ,  
 $b = 0.000272$ ,  $t = 0.999$ , Henry's law constant,  $K = 0.207 \text{ mmol g}^{-1} \text{ atm}^{-1}$

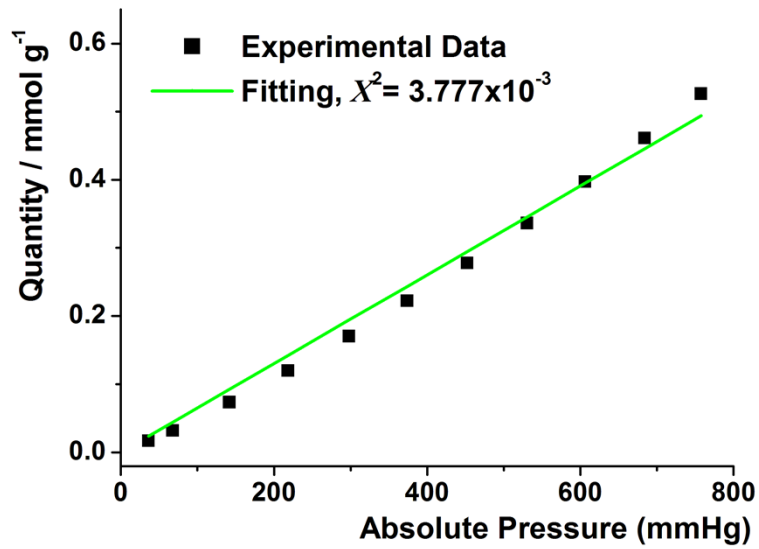

**Fig. S4.** Toth model fitting of CH<sub>4</sub> adsorption isotherm of POP-1 at 298 K.  $q_{\text{sat}} = 4.99$ ,  
 $b = 4.25 \times 10^{-12}$ ,  $t = 2.927$ , Henry's law constant,  $K = 0.496 \text{ mmol g}^{-1} \text{ atm}^{-1}$

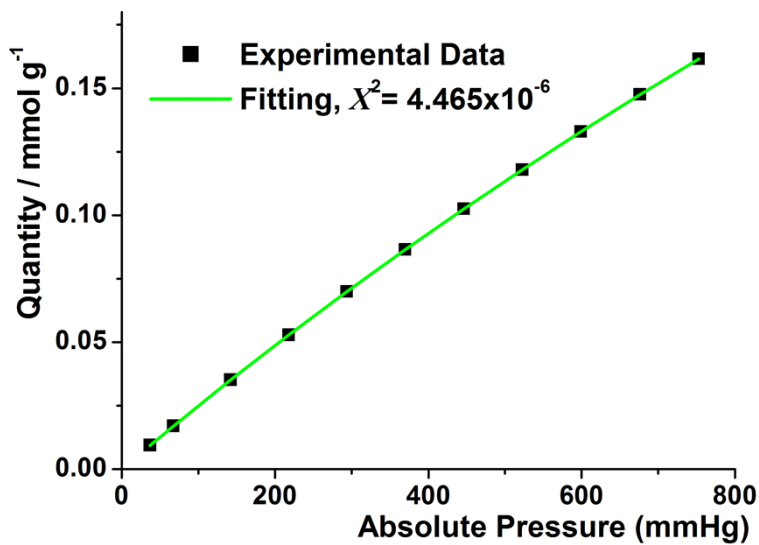

**Fig. S5.** Toth model fitting of O<sub>2</sub> adsorption isotherm of POP-1 at 298 K.  $q_{\text{sat}} = 1.003$ ,  
 $b = 0.000258$ ,  $t = 0.998$ , Henry's law constant,  $K = 0.194 \text{ mmol g}^{-1} \text{ atm}^{-1}$

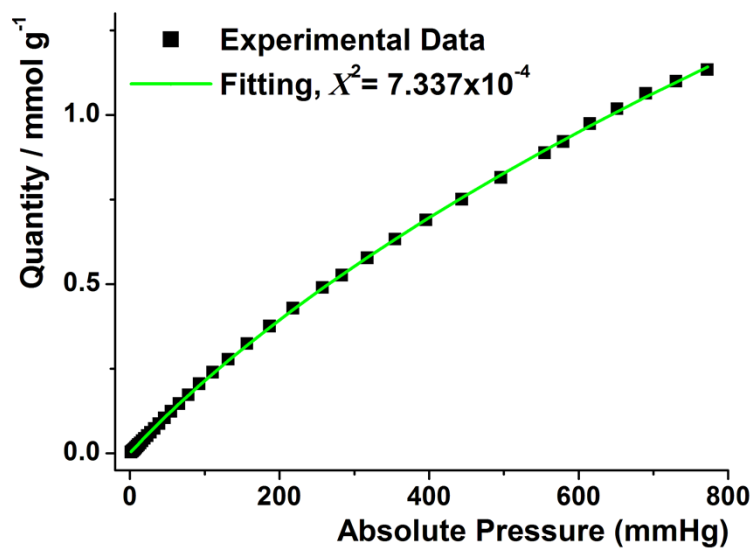

**Fig. S6.** Toth model fitting of CO<sub>2</sub> adsorption isotherm of POP-2 at 298 K.  $q_{\text{sat}} = 8.30$ ,  
 $b = 0.006252$ ,  $t = 0.6272$ , Henry's law constant,  $K = 1.93 \text{ mmol g}^{-1} \text{ atm}^{-1}$

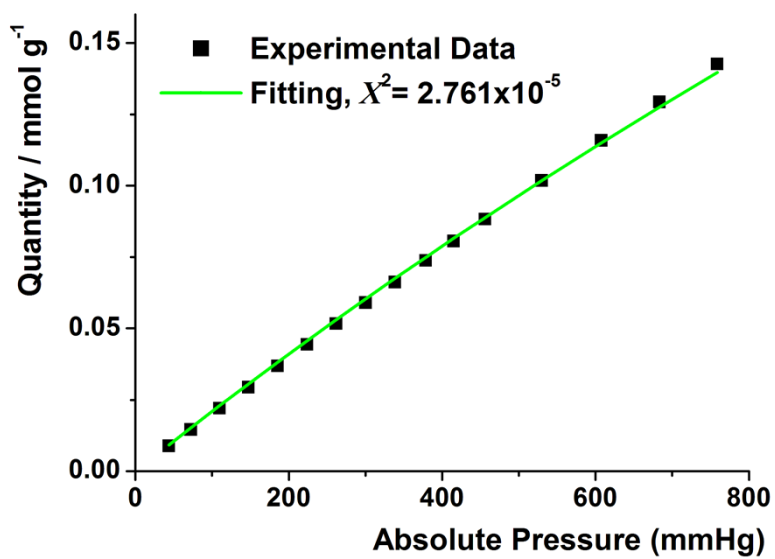

**Fig. S7.** Toth model fitting of N<sub>2</sub> adsorption isotherm of POP-2 at 298 K.  $q_{\text{sat}} = 0.999$ ,  
 $b = 0.000214$ ,  $t = 0.999$ , Henry's law constant,  $K = 0.163 \text{ mmol g}^{-1} \text{ atm}^{-1}$

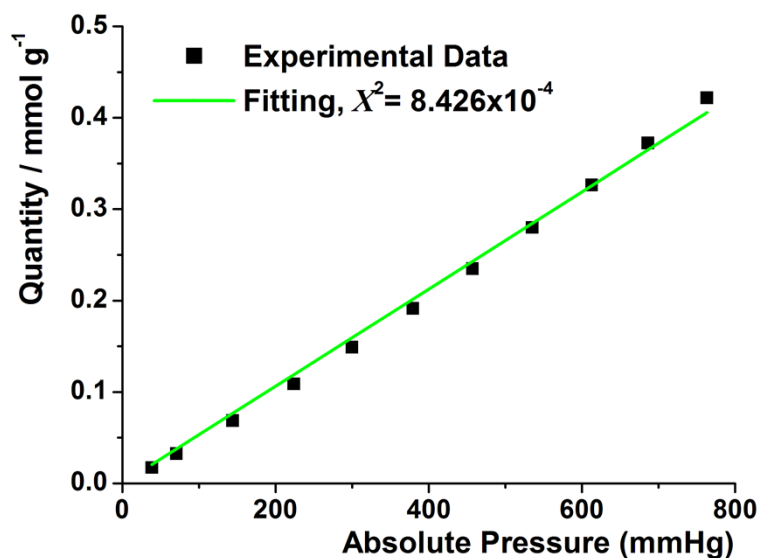

**Fig. S8.** Toth model fitting of CH<sub>4</sub> adsorption isotherm of POP-2 at 298 K.  $q_{\text{sat}} = 4.999$ ,  $b = 5.82 \times 10^{-14}$ ,  $t = 3.331$ , Henry's law constant,  $K = 0.404 \text{ mmol g}^{-1} \text{ atm}^{-1}$

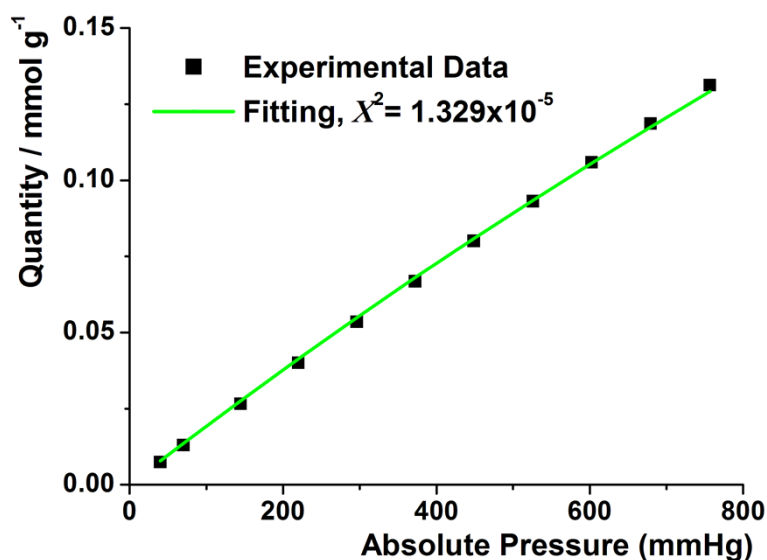

**Fig. S9.** Toth model fitting of O<sub>2</sub> adsorption isotherm of POP-2 at 298 K.  $q_{\text{sat}} = 0.999$ ,  $b = 0.000196$ ,  $t = 0.999$ , Henry's law constant,  $K = 0.149 \text{ mmol g}^{-1} \text{ atm}^{-1}$

## References

- [1] E. Neofotistou, C. D. Malliakas, P. N. Trikalitis, *Chem. Eur. J.*, 2009, **15**, 4523–4527.
- [2] B. Wang, A. P. Côté, H. Furukawa, M. O'Keeffe, O. M. Yaghi, *Nature*, 2008, **453**, 207–211.
